# Supplementary material
Source: publisher site journal article supplement (https://www.spandidos-publications.com/5625/downloadSupplementary)

Figure S1. DLD-1 cells were treated with 10  $\mu\text{g/ml}$  MSpf or control for 72 h, after which total protein was extracted and subjected to western blotting. Expression of proteins associated with MAPK and AKT signaling were determined. \* $P < 0.05$  vs. control. MSpf, protein fraction of maple syrup; p, phosphorylated.

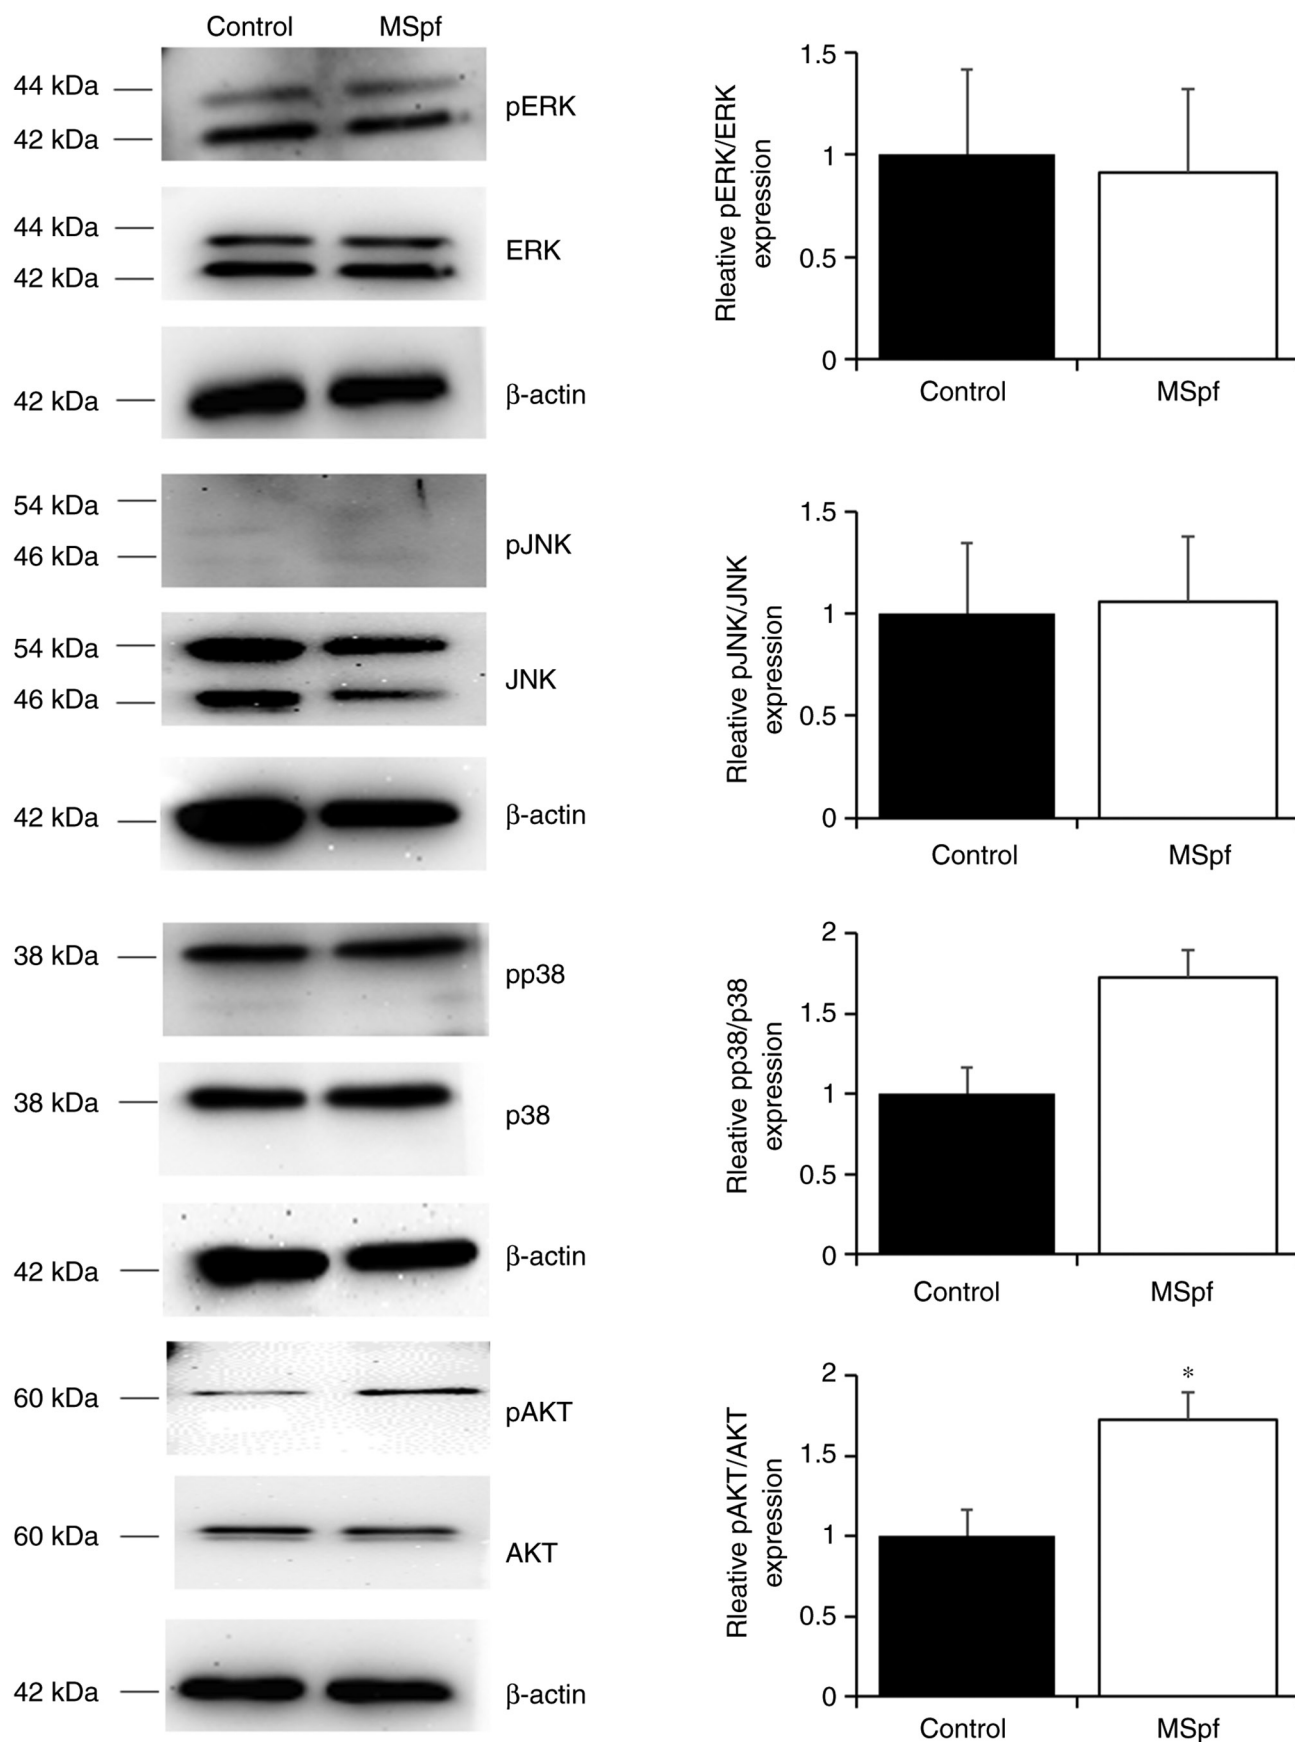

Supplement: Supplementary file 1 [file downloadSupplementary]
